# Supplementary material
Source: Springer Nature journal article supplement (https://www.springermedizin.de/resource/supplementary/12913_2011_2406_MOESM2_ESM.pdf/9530882)
Supplement: MOESM2 [file 9530882]

**Additional file 2 - Frequency of demographic and clinical characteristics and adjusted odds ratios (aOR) and 95% confidence intervals (CI) of cesarean delivery obtained with the four models**

| Variables                                |        |       | Model 1 |                  | Model 2 |                  | Model 3 |                  | Model 4 |                                   |
|------------------------------------------|--------|-------|---------|------------------|---------|------------------|---------|------------------|---------|-----------------------------------|
|                                          | N      | %     | aOR     | CI               | aOR     | CI               | aOR     | CI               | aOR     | CI                                |
| Maternal age                             |        |       |         |                  |         |                  |         |                  |         |                                   |
| <18                                      | 315    | 0.36  | 0.64    | (0.44 - 0.92)    | 0.63    | (0.44 - 0.92)    | 0.40    | (0.27 - 0.58)    | 0.34    | (0.23 - 0.49)                     |
| 18-24                                    | 10,544 | 12.04 | 0.77    | (0.72 - 0.83)    | 0.77    | (0.72 - 0.83)    | 0.59    | (0.55 - 0.63)    | 0.54    | (0.50 - 0.58)                     |
| 25-29                                    | 20,234 | 23.11 | 0.88    | (0.84 - 0.93)    | 0.88    | (0.84 - 0.93)    | 0.79    | (0.74 - 0.83)    | 0.76    | (0.72 - 0.81)                     |
| 30-34                                    | 31,111 | 35.53 | Ref     |                  | Ref     |                  | Ref     |                  | Ref     |                                   |
| 35-39                                    | 20,702 | 23.64 | 1.18    | (1.13 - 1.24)    | 1.18    | (1.13 - 1.24)    | 1.40    | (1.33 - 1.48)    | 1.41    | (1.34 - 1.48)                     |
| <39                                      | 4,668  | 5.33  | 1.82    | (1.68 - 1.97)    | 1.82    | (1.68 - 1.97)    | 2.38    | (2.18 - 2.59)    | 2.36    | (2.17 - 2.57)                     |
| Citizenship                              |        |       |         |                  |         |                  |         |                  |         |                                   |
| Italian                                  | 64,661 | 73.84 |         |                  |         |                  |         |                  | Ref     |                                   |
| High income excluding Italy*             | 884    | 1.01  |         |                  |         |                  |         |                  | 0.73    | (0.59 - 0.91)                     |
| Low income                               | 22,029 | 25.15 |         |                  |         |                  |         |                  | 1.03    | (0.98 - 1.09)                     |
| Maternal education                       |        |       |         |                  |         |                  |         |                  |         |                                   |
| University                               | 20,757 | 23.70 |         |                  |         |                  |         |                  | 0.82    | (0.77 - 0.87)                     |
| High school                              | 39,996 | 45.67 |         |                  |         |                  |         |                  | Ref     |                                   |
| Middle school                            | 23,606 | 26.96 |         |                  |         |                  |         |                  | 0.86    | (0.82 - 0.90)                     |
| Primary                                  | 3,215  | 3.67  |         |                  |         |                  |         |                  | 1.09    | (0.97 - 1.22)                     |
| Marital status                           |        |       |         |                  |         |                  |         |                  |         |                                   |
| Married                                  | 58,002 | 66.23 |         |                  |         |                  |         |                  | Ref     |                                   |
| Not declared                             | 3,928  | 4.49  |         |                  |         |                  |         |                  | 0.89    | (0.80 - 0.98)                     |
| Single                                   | 23,476 | 26.81 |         |                  |         |                  |         |                  | 1.05    | (1.01 - 1.10)                     |
| Separated/divorced                       | 2,034  | 2.32  |         |                  |         |                  |         |                  | 1.13    | (0.99 - 1.29)                     |
| Widow                                    | 134    | 0.15  |         |                  |         |                  |         |                  | 1.33    | (0.81 - 2.17)<br>(32.78 - 186.26) |
| HIV                                      | 76     | 0.09  | 66.50   | (26.50 - 166.88) | 65.95   | (28.48 - 152.72) | 83.84   | (35.19 - 199.77) | 78.13   | (32.78 - 186.26)                  |
| Diabetes                                 | 1,184  | 1.35  | 2.17    | (1.89-2.49)      | 2.17    | (1.89 - 2.49)    | 2.29    | (1.98 - 2.64)    | 2.22    | (1.93 - 2.57)                     |
| Hypertension                             | 1,787  | 2.04  | 3.13    | (2.81 - 3.48)    | 3.15    | (2.83 - 3.50)    | 2.67    | (2.39 - 2.99)    | 2.65    | (2.36 - 2.96)                     |
| Lung diseases                            | 100    | 0.11  | 10.02   | (5.50 - 18.24)   | 5.52    | (3.46 - 8.78)    | 5.47    | (3.30 - 9.06)    | 5.24    | (3.16 - 8.71)                     |
| Other severe comorbidities of the mother | 839    | 0.96  | 4.92    | (4.05 - 5.97)    | 3.23    | (2.77 - 3.76)    | 3.05    | (2.59 - 3.60)    | 3.06    | (2.60 - 3.61)                     |
| Substance abuse                          | 24     | 0.03  | 3.95    | (1.66 - 9.41)    | 3.96    | (1.67 - 9.44)    | 3.45    | (1.44 - 8.25)    | 3.26    | (1.36 - 7.79)                     |
| Eclampsia or pre-eclampsia               | 1,282  | 1.46  | 10.64   | (9.34 - 12.11)   | 10.66   | (9.37 - 12.13)   | 7.33    | (6.38 - 8.43)    | 7.32    | (6.37 - 8.42)                     |

|                                                           |        |       |        |                   |        |                   |        |                   |        |                   |
|-----------------------------------------------------------|--------|-------|--------|-------------------|--------|-------------------|--------|-------------------|--------|-------------------|
| Antepartum hemorrhage/placental abruption/placenta previa | 1,111  | 1.27  | 102.40 | (77.54 - 135.24)  | 102.30 | (77.46 - 135.12)  | 109.78 | (82.46 - 146.13)  | 110.43 | (82.95 - 147.00)  |
| Cephalopelvic disproportion                               | 1,045  | 1.19  | 13.43  | (11.70 - 15.42)   | 13.47  | (11.73 - 15.47)   | 13.60  | (11.67 - 15.83)   | 13.57  | (11.65 - 15.81)   |
| Isoimmunization                                           | 727    | 0.83  | 0.69   | (0.55 - 0.88)     | 0.70   | (0.55 - 0.88)     | 0.73   | (0.57 - 0.93)     | 0.74   | (0.58 - 0.94)     |
| Polyhydramnios                                            | 201    | 0.23  | 3.68   | (2.65 - 5.11)     | 3.68   | (2.65 - 5.11)     | 4.33   | (3.03 - 6.17)     | 4.22   | (2.95 - 6.02)     |
| Oligohydramnios                                           | 3,330  | 3.80  | 1.85   | (1.70 - 2.01)     | 1.84   | (1.69 - 2.01)     | 1.64   | (1.50 - 1.79)     | 1.63   | (1.49 - 1.78)     |
| Other problems of the amnios                              | 83     | 0.09  | 8.29   | (5.06 - 13.59)    | 8.14   | (5.00 - 13.44)    | 6.36   | (3.78 - 10.69)    | 6.40   | (3.81 - 10.76)    |
| Cord prolapse                                             | 60     | 0.07  | 329.48 | (45.43-2389.65)   | 330.42 | (45.56 - 2396.37) | 623.81 | (84.39 - 4611.20) | 623.78 | (84.40 - 4610.26) |
| Premature rupture of membrane                             | 13,228 | 15.10 | 0.81   | (0.76 - 0.85)     | 0.81   | (0.76 - 0.85)     | 0.66   | (0.62 - 0.70)     | 0.65   | (0.62 - 0.69)     |
| Abortion threaten                                         | 289    | 0.33  | 5.01   | (3.71 - 6.76)     | 5.01   | (3.71 - 6.75)     | 2.78   | (2.00 - 3.87)     | 2.77   | (1.99 - 3.85)     |
| Multiple birth                                            | 1,315  | 1.50  | 23.32  | (19.51 - 27.87)   | 23.29  | (19.48 - 27.83)   | 16.50  | (13.55 - 20.09)   | 16.72  | (13.73 - 20.37)   |
| Intrauterine growth retard                                | 1,349  | 1.54  | 6.14   | (5.41 - 6.97)     | 6.14   | (5.40 - 6.96)     | 3.23   | (2.79 - 3.74)     | 3.24   | (2.79 - 3.75)     |
| Fetal abn affecting mother                                | 295    | 0.34  | 5.30   | (4.14 - 6.80)     | 5.32   | (4.15 - 6.81)     | 3.89   | (2.93 - 5.16)     | 3.94   | (2.96 - 5.23)     |
| Malpresentation                                           | 4,317  | 4.93  | 227.86 | (186.20 - 278.85) | 228.08 | (186.37 - 279.12) | 259.22 | (211.19 - 318.17) | 259.98 | (211.81 - 319.11) |
| Gestational age                                           |        | 0.00  |        |                   |        |                   |        |                   |        |                   |
| Term                                                      | 78,818 | 90.00 |        |                   |        |                   | Ref    |                   | Ref    |                   |
| Preterm                                                   | 6,432  | 7.34  |        |                   |        |                   | 1.61   | (1.48 - 1.76)     | 1.60   | (1.47 - 1.75)     |
| Post-term                                                 | 2,324  | 2.65  |        |                   |        |                   | 1.31   | (1.17 - 1.47)     | 1.31   | (1.17 - 1.47)     |
| Neonatal weight                                           |        | 0.00  |        |                   |        |                   |        |                   |        |                   |
| Normal                                                    | 75,972 | 86.75 |        |                   |        |                   | Ref    |                   | Ref    |                   |
| Very low                                                  | 766    | 0.87  |        |                   |        |                   | 4.86   | (3.78 - 6.24)     | 4.81   | (3.75 - 6.19)     |
| Low                                                       | 4,282  | 4.89  |        |                   |        |                   | 1.75   | (1.58 - 1.93)     | 1.74   | (1.58 - 1.92)     |
| Overweight                                                | 6,554  | 7.48  |        |                   |        |                   | 1.19   | (1.10 - 1.28)     | 1.19   | (1.10 - 1.28)     |
| Congenital malformation                                   | 818    | 0.93  |        |                   |        |                   | 1.60   | (1.32 - 1.94)     | 1.60   | (1.32 - 1.94)     |
| Multiparity                                               | 34,721 | 39.65 |        |                   |        |                   | 0.21   | (0.20 - 0.22)     | 0.20   | (0.19 - 0.21)     |
| Previous stillbirth                                       | 14,288 | 16.32 |        |                   |        |                   | 1.12   | (1.06 - 1.18)     | 1.12   | (1.06 - 1.18)     |

\*High-income countries have been defined as in the World Bank Country classification (<http://data.worldbank.org/about/country-classifications>)
